# Supplementary material for: Carbon Emission and Biodiversity of Arctic Soil Microbial Communities of the Novaya Zemlya and Franz Josef Land Archipelagos
Source: MDPI journal article supplement (doi:10.3390/microorganisms11020482), 2023-02-15
Supplement: s1 [file s1]

Supplementary Table S1. Novaya Zemlya

|              | CO2 emission | Temperature | WEOC      | MBC             | pH        | Moisture |
|--------------|--------------|-------------|-----------|-----------------|-----------|----------|
| CO2 emission | 1.000000     |             |           |                 |           |          |
| Temperature  | 0.096006     | 1.000000    |           |                 |           |          |
| WEOC         | 0.064681     | -0.006803   | 1.000000  |                 |           |          |
| MBC          | 0.210795     | 0.269766    | -0.277711 | 1.000000        |           |          |
| pH           | 0.171284     | 0.104237    | 0.034641  | <b>0.534143</b> | 1.000000  |          |
| Moisture     | 0.376780     | 0.049045    | -0.016098 | 0.293271        | -0.274802 | 1.000000 |

Supplementary Table S2. Heiss Island

|              | CO2 emission    | Temperature | WEOC            | MBC             | pH       | Moisture |
|--------------|-----------------|-------------|-----------------|-----------------|----------|----------|
| CO2 emission | 1.000000        |             |                 |                 |          |          |
| Temperature  | 0.230802        | 1.000000    |                 |                 |          |          |
| WEOC         | 0.185400        | 0.008384    | 1.000000        |                 |          |          |
| MBC          | <b>0.512794</b> | 0.075314    | <b>0.621024</b> | 1.000000        |          |          |
| pH           | 0.128127        | -0.102226   | 0.272073        | 0.014930        | 1.000000 |          |
| Moisture     | <b>0.558109</b> | -0.021042   | <b>0.702022</b> | <b>0.840699</b> | 0.126845 | 1.000000 |

Supplementary Table S3. Hooker Island

|              | CO2 emission    | Temperature | WEOC            | MBC             | pH       | Moisture |
|--------------|-----------------|-------------|-----------------|-----------------|----------|----------|
| CO2 emission | 1.000000        |             |                 |                 |          |          |
| Temperature  | <b>0.548832</b> | 1.000000    |                 |                 |          |          |
| WEOC         | 0.212303        | -0.141420   | 1.000000        |                 |          |          |
| MBC          | <b>0.446942</b> | 0.157067    | <b>0.744983</b> | 1.000000        |          |          |
| pH           | 0.242071        | -0.146482   | 0.077014        | 0.082068        | 1.000000 |          |
| Moisture     | <b>0.737586</b> | 0.301643    | <b>0.502596</b> | <b>0.716041</b> | 0.227703 | 1.000000 |

Supplementary Table S4. Microbial diversity indices

|                  | Observed  | Chao1     | ACE       | Shannon | Simpson | InvSimpson | Fisher    |
|------------------|-----------|-----------|-----------|---------|---------|------------|-----------|
| Hooker_Island_1  | 420.00000 | 423.00000 | 420.91804 | 5.55546 | 0.99281 | 139.02334  | 87.22105  |
| Hooker_Island_2  | 275.00000 | 276.50000 | 275.64453 | 4.90819 | 0.98335 | 60.05830   | 54.68733  |
| Hooker_Island_3  | 478.00000 | 480.50000 | 478.72967 | 5.76626 | 0.99523 | 209.44805  | 98.00051  |
| Hooker_Island_4  | 468.00000 | 471.00000 | 468.92422 | 5.66257 | 0.99392 | 164.60530  | 93.74004  |
| Hooker_Island_5  | 535.00000 | 535.54545 | 535.65185 | 5.85494 | 0.99534 | 214.62439  | 110.00272 |
| Hooker_Island_6  | 350.00000 | 351.20000 | 350.62032 | 5.53143 | 0.99437 | 177.58597  | 74.96858  |
| Hooker_Island_7  | 460.00000 | 465.25000 | 461.18633 | 5.68298 | 0.99440 | 178.64065  | 91.43908  |
| Hooker_Island_8  | 464.00000 | 469.60000 | 465.33062 | 5.74030 | 0.99507 | 202.64778  | 97.23268  |
| Hooker_Island_9  | 468.00000 | 473.25000 | 469.20480 | 5.72237 | 0.99446 | 180.60450  | 98.91427  |
| Novaya_Zemlya_1  | 104.00000 | 104.00000 | 104.17365 | 2.56843 | 0.77284 | 4.40221    | 15.23095  |
| Novaya_Zemlya_10 | 54.00000  | 54.00000  | 54.24541  | 0.89675 | 0.27228 | 1.37416    | 7.05127   |
| Novaya_Zemlya_11 | 105.00000 | 105.00000 | 105.19431 | 3.28576 | 0.91735 | 12.09854   | 16.06541  |
| Novaya_Zemlya_12 | 125.00000 | 125.00000 | 125.14798 | 3.13755 | 0.88023 | 8.34957    | 18.84468  |
| Novaya_Zemlya_13 | 37.00000  | 39.00000  | 39.62199  | 0.39499 | 0.11286 | 1.12722    | 4.42383   |
| Novaya_Zemlya_14 | 124.00000 | 125.50000 | 124.66860 | 2.79194 | 0.76270 | 4.21402    | 20.42766  |
| Novaya_Zemlya_15 | 47.00000  | 47.00000  | 47.00000  | 0.49417 | 0.13718 | 1.15899    | 5.86791   |
| Novaya_Zemlya_16 | 92.00000  | 92.00000  | 92.00000  | 3.17568 | 0.92718 | 13.73321   | 12.95456  |
| Novaya_Zemlya_17 | 128.00000 | 128.00000 | 128.15315 | 3.58163 | 0.93574 | 15.56256   | 21.25083  |
| Novaya_Zemlya_18 | 154.00000 | 154.00000 | 154.00000 | 3.77482 | 0.92814 | 13.91646   | 28.38889  |
| Novaya_Zemlya_19 | 125.00000 | 126.00000 | 125.31677 | 1.79696 | 0.49591 | 1.98376    | 19.61448  |
| Novaya_Zemlya_2  | 165.00000 | 165.25000 | 165.31517 | 3.15549 | 0.88416 | 8.63274    | 26.26483  |
| Novaya_Zemlya_20 | 51.00000  | 52.00000  | 51.40821  | 0.55753 | 0.16723 | 1.20081    | 6.61265   |
| Novaya_Zemlya_21 | 52.00000  | 53.00000  | 52.46918  | 0.49334 | 0.14197 | 1.16546    | 6.70702   |
| Novaya_Zemlya_22 | 90.00000  | 90.00000  | 90.21615  | 1.12103 | 0.31135 | 1.45211    | 12.67677  |
| Novaya_Zemlya_23 | 119.00000 | 119.00000 | 119.14626 | 3.43770 | 0.88269 | 8.52430    | 21.88189  |
| Novaya_Zemlya_24 | 253.00000 | 254.00000 | 253.50031 | 4.72662 | 0.98039 | 50.99612   | 49.78833  |
| Novaya_Zemlya_25 | 82.00000  | 82.25000  | 82.59439  | 1.24264 | 0.36552 | 1.57610    | 11.16341  |
| Novaya_Zemlya_3  | 163.00000 | 164.00000 | 163.29630 | 3.32098 | 0.87502 | 8.00129    | 26.87810  |
| Novaya_Zemlya_4  | 194.00000 | 194.00000 | 194.14925 | 3.34251 | 0.84822 | 6.58834    | 33.79352  |

|                 |           |           |           |         |         |           |           |
|-----------------|-----------|-----------|-----------|---------|---------|-----------|-----------|
| Novaya_Zemlya_5 | 220.00000 | 220.00000 | 220.00000 | 4.37430 | 0.97411 | 38.62463  | 39.50228  |
| Novaya_Zemlya_6 | 83.00000  | 83.00000  | 83.00000  | 0.70253 | 0.18962 | 1.23398   | 10.97295  |
| Novaya_Zemlya_7 | 172.00000 | 173.50000 | 172.50230 | 3.36724 | 0.89511 | 9.53408   | 28.02837  |
| Novaya_Zemlya_8 | 113.00000 | 113.00000 | 113.17979 | 3.52268 | 0.94448 | 18.01297  | 18.00565  |
| Novaya_Zemlya_9 | 148.00000 | 148.25000 | 148.33557 | 3.77522 | 0.95910 | 24.45075  | 23.92705  |
| Heiss_Island_1  | 489.00000 | 498.00000 | 490.78902 | 5.81711 | 0.99541 | 217.73495 | 102.41070 |
| Heiss_Island_10 | 481.00000 | 494.75000 | 483.32777 | 5.67690 | 0.99412 | 170.15610 | 97.96096  |
| Heiss_Island_11 | 426.00000 | 428.50000 | 426.75552 | 5.57507 | 0.99332 | 149.77397 | 86.17301  |
| Heiss_Island_12 | 447.00000 | 448.87500 | 447.96925 | 5.61622 | 0.99367 | 158.07314 | 89.16769  |
| Heiss_Island_13 | 430.00000 | 431.42857 | 430.77930 | 5.59947 | 0.99391 | 164.22225 | 87.28989  |
| Heiss_Island_14 | 625.00000 | 638.12500 | 628.12891 | 5.93051 | 0.99512 | 204.73629 | 125.77947 |
| Heiss_Island_15 | 542.00000 | 542.76923 | 542.95068 | 5.71526 | 0.99343 | 152.20838 | 106.48680 |
| Heiss_Island_16 | 562.00000 | 575.20000 | 564.01115 | 5.78458 | 0.99416 | 171.11251 | 111.04079 |
| Heiss_Island_17 | 602.00000 | 615.00000 | 604.98890 | 5.82058 | 0.99429 | 175.08519 | 118.07336 |
| Heiss_Island_18 | 574.00000 | 579.07692 | 576.56150 | 5.75678 | 0.99406 | 168.31778 | 112.18740 |
| Heiss_Island_19 | 564.00000 | 575.00000 | 566.49288 | 5.76393 | 0.99379 | 160.96272 | 111.03534 |
| Heiss_Island_2  | 443.00000 | 454.25000 | 444.81101 | 5.74617 | 0.99534 | 214.77726 | 93.21146  |
| Heiss_Island_20 | 529.00000 | 532.60000 | 530.66559 | 5.67034 | 0.99296 | 141.99055 | 103.93549 |
| Heiss_Island_21 | 576.00000 | 577.75000 | 577.34477 | 5.85176 | 0.99464 | 186.73609 | 116.46463 |
| Heiss_Island_22 | 464.00000 | 471.00000 | 465.32344 | 5.65035 | 0.99421 | 172.65354 | 93.17111  |
| Heiss_Island_23 | 401.00000 | 405.20000 | 402.30398 | 5.42398 | 0.99185 | 122.77064 | 78.32529  |
| Heiss_Island_24 | 429.00000 | 431.14286 | 430.08378 | 5.28230 | 0.98573 | 70.05607  | 82.52687  |
| Heiss_Island_25 | 494.00000 | 509.60000 | 497.06622 | 5.67450 | 0.99365 | 157.42295 | 98.79735  |
| Heiss_Island_3  | 472.00000 | 478.60000 | 474.68043 | 5.63902 | 0.99327 | 148.65332 | 96.07013  |
| Heiss_Island_4  | 448.00000 | 463.00000 | 449.95084 | 5.39518 | 0.98814 | 84.29943  | 87.50485  |
| Heiss_Island_5  | 364.00000 | 371.00000 | 365.09829 | 5.39702 | 0.99136 | 115.75816 | 75.02330  |
| Heiss_Island_6  | 497.00000 | 502.62500 | 498.94537 | 5.85330 | 0.99581 | 238.52813 | 105.28619 |
| Heiss_Island_7  | 472.00000 | 481.16667 | 474.24138 | 5.72508 | 0.99474 | 190.20757 | 99.54676  |
| Heiss_Island_8  | 492.00000 | 505.00000 | 495.23057 | 5.78720 | 0.99507 | 202.67504 | 103.63317 |
| Heiss_Island_9  | 579.00000 | 586.20000 | 580.44878 | 5.97419 | 0.99597 | 248.07042 | 121.54835 |
